# Supplementary material for: Development of an innovative double-chamber syringe for intravenous therapeutics and flushing: Nurses’ involvement through a human-centred approach
Source: PubMed Central journal article supplement (PMC7316231; doi:10.1371/journal.pone.0235087), 2020-06-25

**Design solution 1.**

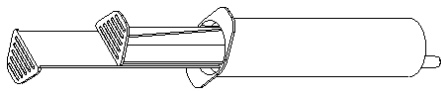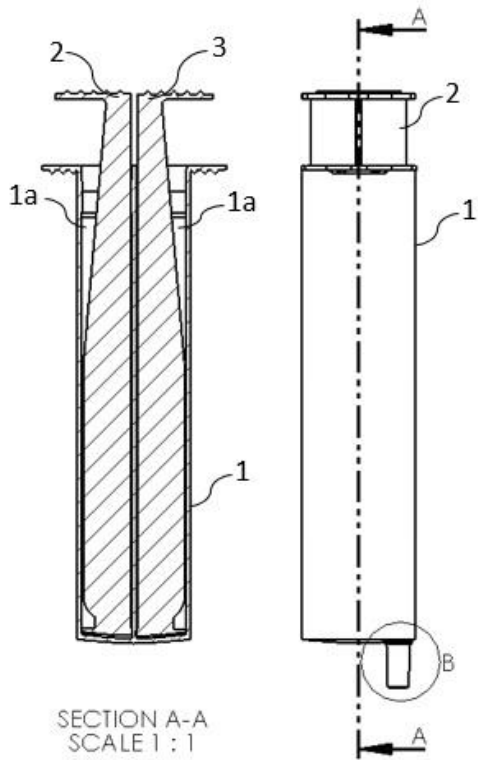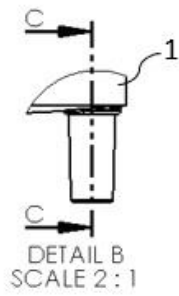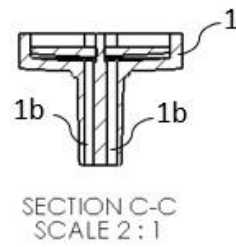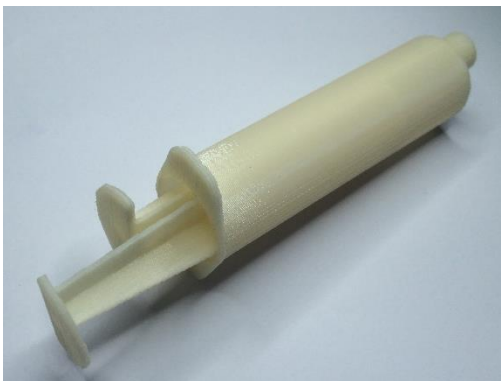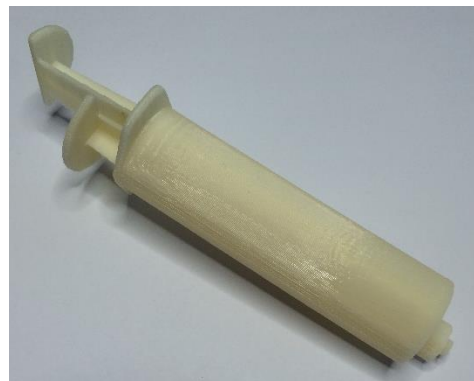

**Design solution 3.**

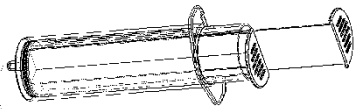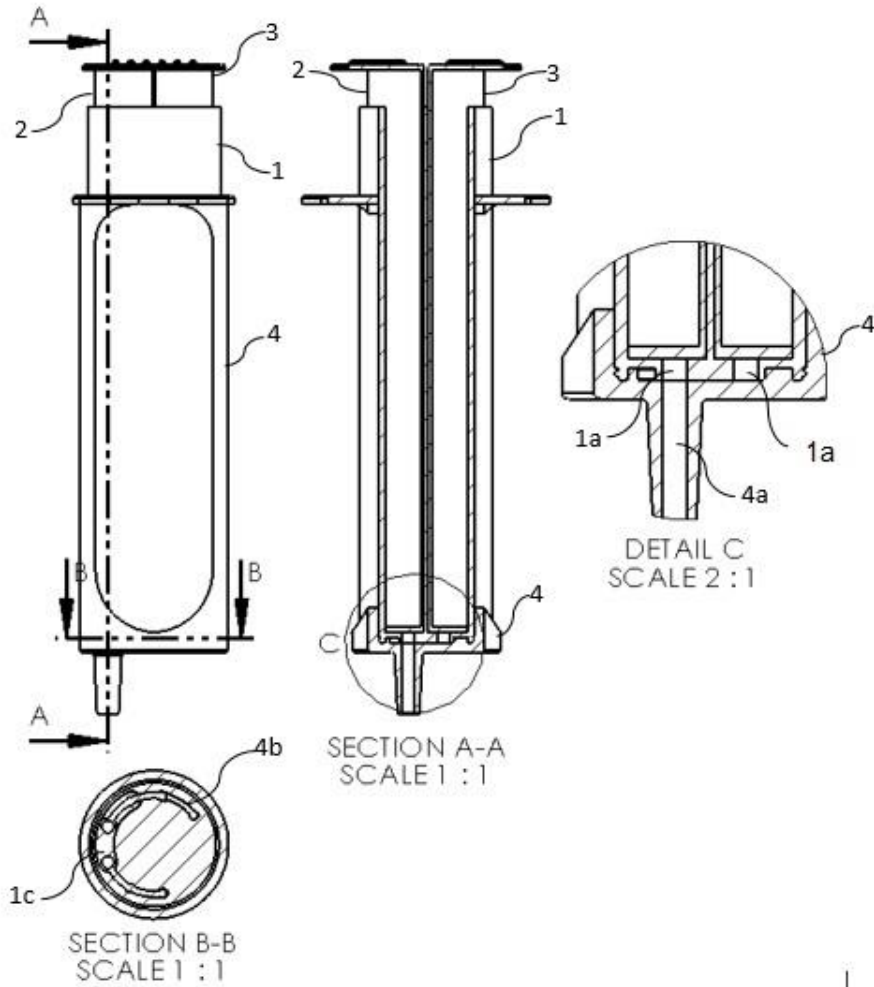

**Design solution 4.**

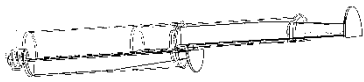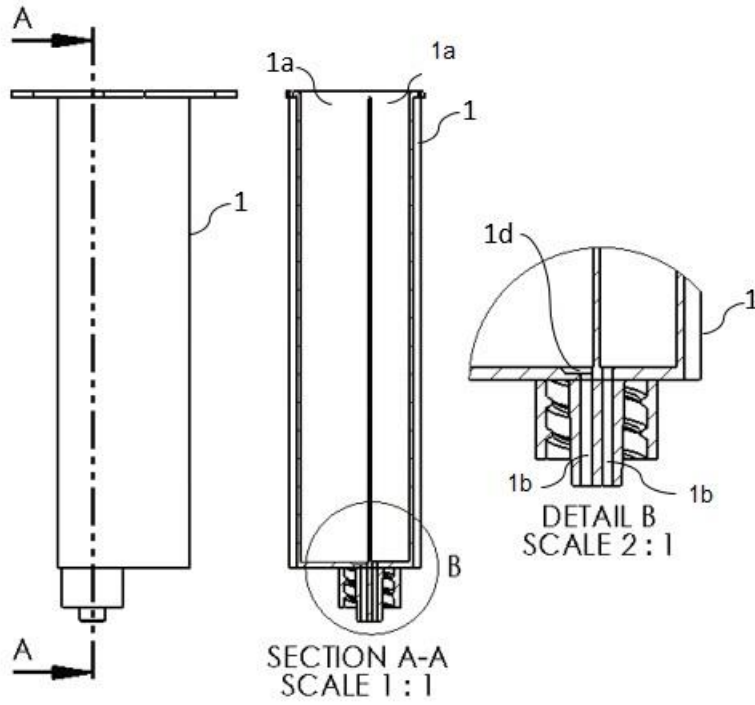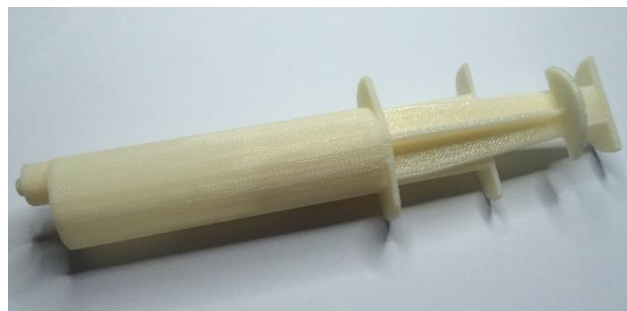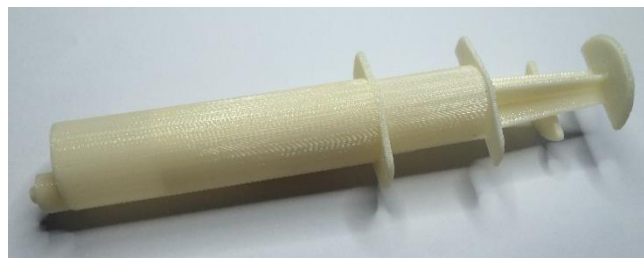

Design solution 5.

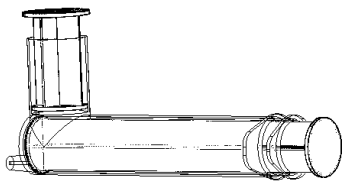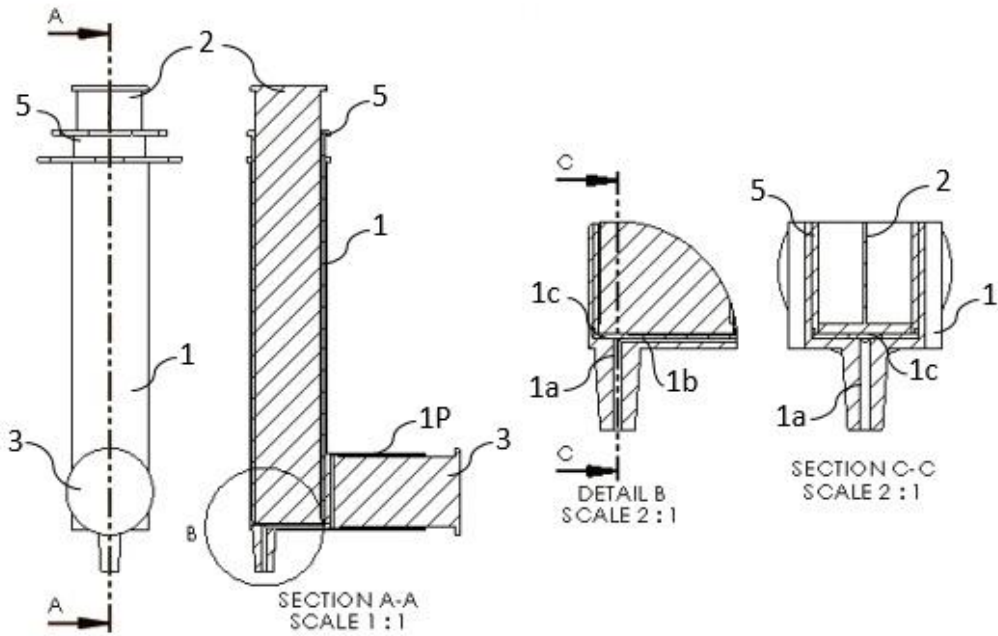

**Design solution 6.**

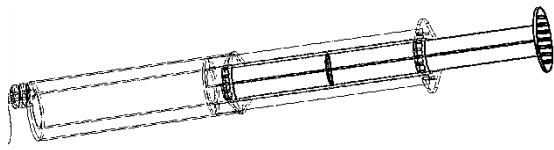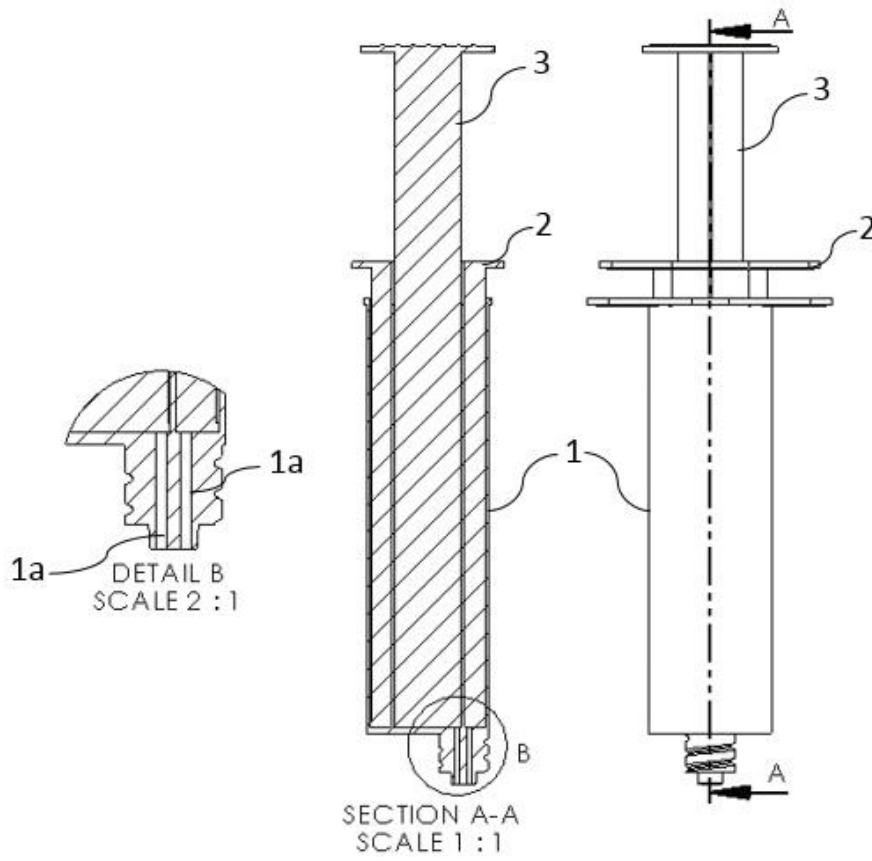

Supplement: pone.0235087.s002.pdf [file pone.0235087.s002.pdf]
